# Supplementary material for: Exploring Beneficial Properties of Haskap Berry Leaf Compounds for Gut Health Enhancement
Source: MDPI journal article supplement (doi:10.3390/antiox13030357), 2024-03-17
Supplement: s1 [file s1]

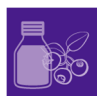

## Article

# Exploring Beneficial Properties of Haskap Berry Leaf Compounds for Gut Health Enhancement

Szymon Sip <sup>1</sup>, Anna Sip <sup>2</sup>, Piotr Szulc <sup>3</sup>, Marek Selwet <sup>4</sup>, Marcin Żarowski <sup>5</sup>, Bogusław Czerny <sup>6</sup> and Judyta Cielecka-Piontek <sup>1,7,\*</sup>

<sup>1</sup> Department of Pharmacognosy and Biomaterials, Faculty of Pharmacy, Poznań University of Medical Sciences, Rokietnicka 3, 60-806 Poznań, Poland; szymonsip@ump.edu.pl

<sup>2</sup> Department of Biotechnology and Food Microbiology, Poznań University of Life Sciences, Wojska Polskiego 48, 60-627 Poznań, Poland; anna.sip@up.poznan.pl

<sup>3</sup> Department of Agronomy, Poznań University of Life Sciences, Dojazd 11, 60-632 Poznań, Poland; piotr.szulc@up.poznan.pl

<sup>4</sup> Department of Soil Science and Microbiology, Poznań University of Life Sciences, Szydlowska 50, 60-656 Poznań, Poland; marek.selwet@up.poznan.pl

<sup>5</sup> Department of Developmental Neurology, Poznań University of Medical Sciences, Przybyszewski 49, 60-355 Poznań, Poland; zarowski@ump.edu.pl

<sup>6</sup> Department of General Pharmacology and Pharmacoeconomics, Pomeranian Medical University in Szczecin, Żołnierska 48, 70-204 Szczecin, Poland; bczerny@wp.pl

<sup>7</sup> Department of Pharmacology and Phytochemistry, Institute of Natural Fibres and Medicinal Plants, Wojska Polskiego 71b, 60-630 Poznań, Poland

\* Correspondence: jpiontek@ump.edu.pl

**Abstract:** This study investigates the potential of formulated systems utilising haskap berry leaf extracts and dextran as carriers, to modulate both antioxidant and enzymatic inhibitory activities and their impact on the growth of specific bacterial strains. The analysis of antioxidant capacity, assessed through ABTS, CUPRAC, DPPH, and FRAP assays, revealed varying but consistently high levels across extracts, with Extract 3 (loganic acid: 2.974 mg/g, chlorogenic acid: 1.125 mg/g, caffeic acid: 0.083 mg/g, rutin: 1.137 mg/g, and quercetin: 1.501 mg/g) exhibiting the highest values (ABTS: 0.2447 mg/mL, CUPRAC: 0.3121 mg/mL, DPPH: 0.21001 mg/mL, and FRAP: 0.3411 mg/mL). Subsequent enzymatic inhibition assays demonstrated a notable inhibitory potential against  $\alpha$ -glucosidase (1.4915 mg/mL, expressed as acarbose equivalent), hyaluronidase (0.2982 mg/mL, expressed as quercetin equivalent), and lipase (5.8715  $\mu$ g/mL, expressed as orlistat equivalent). Further system development involved integration with dextran, showcasing their preserved bioactive compound content and emphasising their stability and potential bioactivity. Evaluation of the dextran systems' impact on bacterial growth revealed a significant proliferation of beneficial strains, particularly the *Bifidobacterium* and *Lactobacilli* genus (*Bifidobacterium longum*:  $9.54 \times 10^7$  to  $1.57 \times 10^{10}$  CFU/mL and *Ligilactobacillus salivarius*:  $1.36 \times 10^9$  to  $1.62 \times 10^{10}$  CFU/mL), suggesting their potential to modulate gut microbiota. These findings offer a foundation for exploring the therapeutic applications of haskap berry-based dextran systems in managing conditions like diabetes, emphasising the interconnected roles of antioxidant-rich botanical extracts and dextran formulations in promoting overall metabolic health.

**Keywords:** haskap berry; prebiotic potential; antioxidants; by-products; delivery systems; dextran

**Table S1.** The microbial analysis over 72 hours of different potentially pathogenic bacterial strains across the control and dextran systems. No statistically significant differences were found ( $p < 0.05$ )

|                               | Time [H] | Control            | System 1           | System 2           | System 3           | Dextran 5000       | Dextran 40 000     | Dextran 70 000     |
|-------------------------------|----------|--------------------|--------------------|--------------------|--------------------|--------------------|--------------------|--------------------|
| <i>Bacillus subtilis</i>      | 24       | $7.82 \times 10^8$ | $8.52 \times 10^8$ | $8.88 \times 10^8$ | $8.21 \times 10^8$ | $7.29 \times 10^8$ | $7.53 \times 10^8$ | $7.65 \times 10^8$ |
|                               | 48       | $1.48 \times 10^9$ | $1.29 \times 10^9$ | $1.31 \times 10^9$ | $1.40 \times 10^9$ | $1.36 \times 10^9$ | $1.33 \times 10^9$ | $1.41 \times 10^9$ |
|                               | 72       | $1.13 \times 10^9$ | $1.11 \times 10^9$ | $1.19 \times 10^9$ | $1.03 \times 10^9$ | $1.16 \times 10^9$ | $1.08 \times 10^9$ | $1.22 \times 10^9$ |
| <i>Enterococcus faecalis</i>  | 24       | $1.45 \times 10^8$ | $1.81 \times 10^8$ | $2.03 \times 10^8$ | $1.92 \times 10^8$ | $1.71 \times 10^8$ | $1.62 \times 10^8$ | $1.55 \times 10^8$ |
|                               | 48       | $3.17 \times 10^8$ | $3.32 \times 10^8$ | $3.22 \times 10^8$ | $3.38 \times 10^8$ | $3.27 \times 10^8$ | $3.29 \times 10^8$ | $3.32 \times 10^8$ |
|                               | 72       | $2.22 \times 10^8$ | $2.12 \times 10^8$ | $2.38 \times 10^8$ | $2.19 \times 10^8$ | $2.34 \times 10^8$ | $2.28 \times 10^8$ | $2.09 \times 10^8$ |
| <i>Listeria monocytogenes</i> | 24       | $4.39 \times 10^8$ | $4.51 \times 10^8$ | $4.31 \times 10^8$ | $4.41 \times 10^8$ | $4.61 \times 10^8$ | $4.51 \times 10^8$ | $4.41 \times 10^8$ |
|                               | 48       | $7.15 \times 10^8$ | $7.31 \times 10^8$ | $7.21 \times 10^8$ | $7.31 \times 10^8$ | $7.41 \times 10^8$ | $7.31 \times 10^8$ | $7.21 \times 10^8$ |
|                               | 72       | $2.09 \times 10^8$ | $2.32 \times 10^8$ | $2.42 \times 10^8$ | $2.21 \times 10^8$ | $2.26 \times 10^8$ | $2.21 \times 10^8$ | $2.11 \times 10^8$ |
| <i>Staphylococcus aureus</i>  | 24       | $1.37 \times 10^9$ | $1.51 \times 10^9$ | $1.62 \times 10^9$ | $1.73 \times 10^9$ | $1.52 \times 10^9$ | $1.43 \times 10^9$ | $1.34 \times 10^9$ |
|                               | 48       | $1.18 \times 10^9$ | $1.42 \times 10^9$ | $1.31 \times 10^9$ | $1.42 \times 10^9$ | $1.37 \times 10^9$ | $1.39 \times 10^9$ | $1.24 \times 10^9$ |
|                               | 72       | $1.72 \times 10^9$ | $1.81 \times 10^9$ | $1.71 \times 10^9$ | $1.81 \times 10^9$ | $1.76 \times 10^9$ | $1.71 \times 10^9$ | $1.61 \times 10^9$ |
| <i>Escherichia coli</i>       | 24       | $1.12 \times 10^9$ | $1.21 \times 10^9$ | $1.11 \times 10^9$ | $1.16 \times 10^9$ | $1.11 \times 10^9$ | $1.06 \times 10^9$ | $1.13 \times 10^9$ |
|                               | 48       | $1.26 \times 10^9$ | $1.31 \times 10^9$ | $1.26 \times 10^9$ | $1.36 \times 10^9$ | $1.31 \times 10^9$ | $1.33 \times 10^9$ | $1.30 \times 10^9$ |
|                               | 72       | $1.59 \times 10^9$ | $1.79 \times 10^9$ | $1.69 \times 10^9$ | $1.79 \times 10^9$ | $1.74 \times 10^9$ | $1.69 \times 10^9$ | $1.59 \times 10^9$ |
| <i>Pseudomonas aeruginosa</i> | 24       | $3.83 \times 10^8$ | $4.30 \times 10^8$ | $4.00 \times 10^8$ | $4.20 \times 10^8$ | $4.10 \times 10^8$ | $4.00 \times 10^8$ | $3.90 \times 10^8$ |
|                               | 48       | $3.89 \times 10^8$ | $4.10 \times 10^8$ | $3.90 \times 10^8$ | $4.00 \times 10^8$ | $3.90 \times 10^8$ | $3.80 \times 10^8$ | $3.90 \times 10^8$ |
|                               | 72       | $3.79 \times 10^8$ | $3.90 \times 10^8$ | $3.80 \times 10^8$ | $3.90 \times 10^8$ | $3.80 \times 10^8$ | $3.70 \times 10^8$ | $3.90 \times 10^8$ |
| <i>Salmonella enterica</i>    | 24       | $2.29 \times 10^8$ | $2.30 \times 10^8$ | $2.20 \times 10^8$ | $2.30 \times 10^8$ | $2.10 \times 10^8$ | $2.00 \times 10^8$ | $2.20 \times 10^8$ |
|                               | 48       | $5.56 \times 10^8$ | $5.80 \times 10^8$ | $5.60 \times 10^8$ | $5.80 \times 10^8$ | $5.70 \times 10^8$ | $5.50 \times 10^8$ | $5.70 \times 10^8$ |
|                               | 72       | $2.08 \times 10^8$ | $2.30 \times 10^8$ | $2.20 \times 10^8$ | $2.30 \times 10^8$ | $2.20 \times 10^8$ | $2.10 \times 10^8$ | $2.20 \times 10^8$ |

**Table S2.** HPLC method validation parameters

| Parameter                              | Loganic acid            | Chlorogenic acid        | Caffeic acid            | Rutin                   | Quercetin               |
|----------------------------------------|-------------------------|-------------------------|-------------------------|-------------------------|-------------------------|
| Linearity: $y = ax + b$                | $y = 126,74x + 0,2999$  | $y = 564,25x + 2,6133$  | $y = 1298,4x - 0,3044$  | $y = 1164,9x - 0,2995$  | $y = 1455,3x - 0,3184$  |
| Correlation coefficient ( $r$ )        | 0,9999                  | 0,9998                  | 0,9998                  | 0,9997                  | 0,9998                  |
| Range of linearity [mg/ml]             | 0,01-5,00               | 0,01-5,00               | 0,001-1,00              | 0,01-5,00               | 0,01-5,00               |
| Limit of detection (LOD): [mg/ml]      | $1,2590 \times 10^{-4}$ | $2,1125 \times 10^{-4}$ | $1,1249 \times 10^{-4}$ | $2,3114 \times 10^{-4}$ | $1,6530 \times 10^{-4}$ |
| Limit of quantification (LOQ): [mg/ml] | $4,1547 \times 10^{-4}$ | $6,9713 \times 10^{-4}$ | $3,7121 \times 10^{-4}$ | $7,6276 \times 10^{-4}$ | $5,4549 \times 10^{-4}$ |
| Intra-day precision, RSD               |                         |                         |                         |                         |                         |
| 0,001 mg/ml                            | 1,08 %                  | 1,19 %                  | 1,14 %                  | 1,14 %                  | 1,11 %                  |
| 0,05 mg/ml                             | 1,13 %                  | 1,11 %                  | 1,15 %                  | 1,33 %                  | 1,22 %                  |
| 0,1 mg/ml                              | 1,11 %                  | 1,24 %                  | 1,15 %                  | 1,13 %                  | 1,12 %                  |
| Inter-day precision, RSD               |                         |                         |                         |                         |                         |
| 0,001 mg/ml                            | 1,14 %                  | 1,39 %                  | 1,09 %                  | 1,04 %                  | 1,19 %                  |
| 0,05 mg/ml                             | 1,20 %                  | 1,21 %                  | 1,09 %                  | 1,05 %                  | 1,16 %                  |
| 0,1 mg/ml                              | 1,35 %                  | 1,25 %                  | 1,03 %                  | 1,13 %                  | 1,15 %                  |
| Accuracy                               | 99,59 %                 | 99,54 %                 | 99,68 %                 | 99,69 %                 | 99,65 %                 |

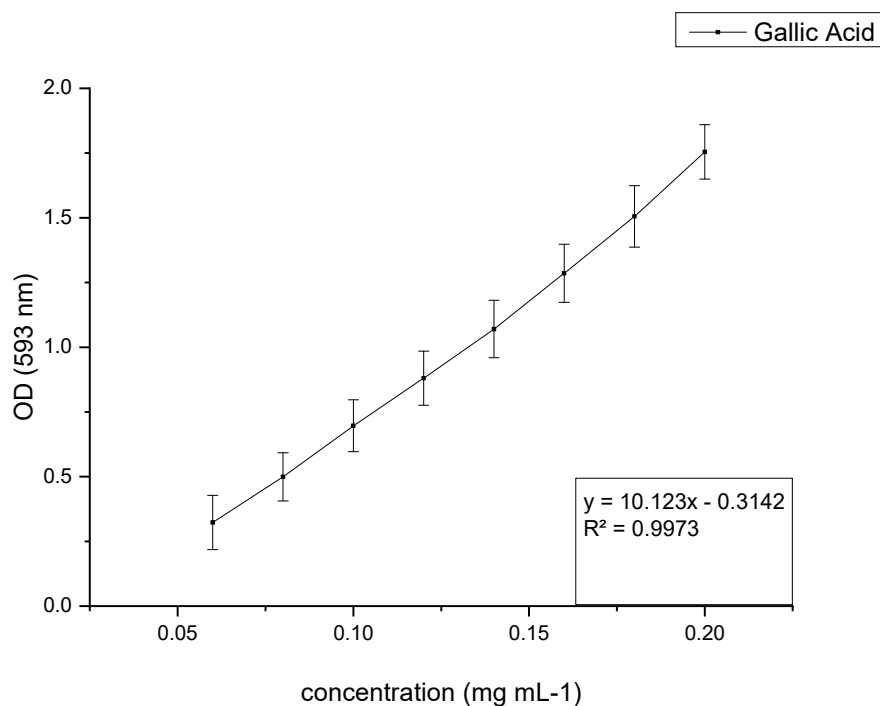**Figure S1.** Standard curve for the conversion of TPC expressed as gallic acid equivalent

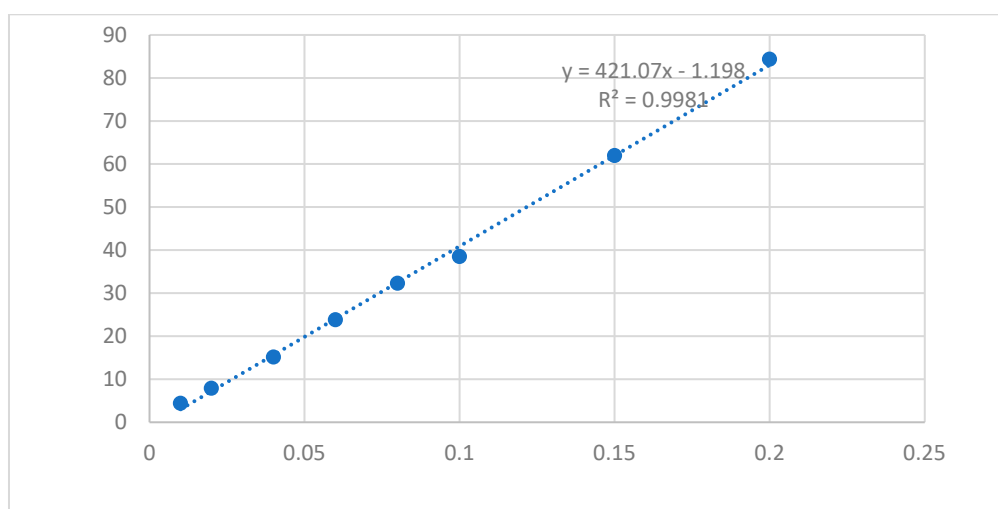

**Figure S2.** Standard curve for the conversion of antioxidant activity in the ABTS assay for Trolox

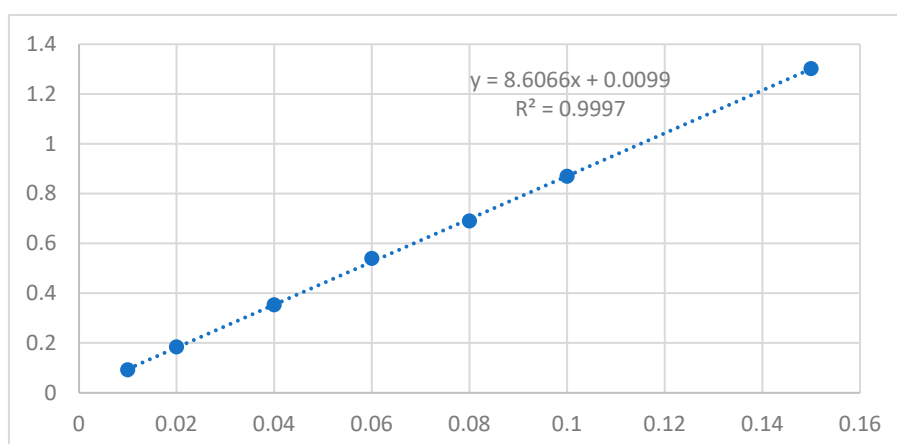

**Figure S3.** Standard curve for the conversion of antioxidant activity in the CUPRAC assay for Trolox

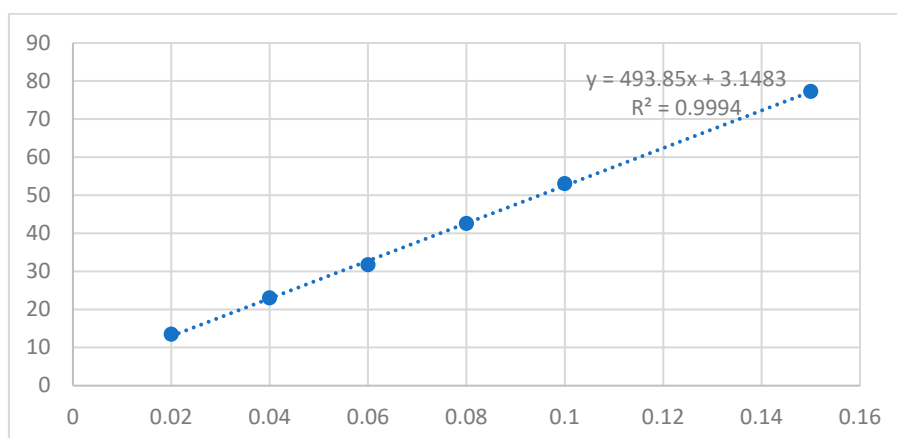

**Figure S4.** Standard curve for the conversion of antioxidant activity in the DPPH assay for Trolox

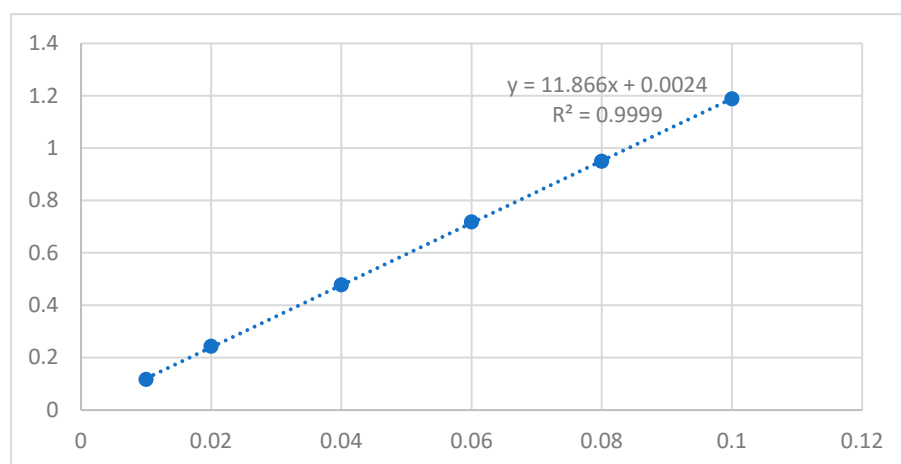

**Figure S5.** Standard curve for the conversion of antioxidant activity in the FRAP assay for Trolox
